# Supplementary material for: Rapid and sensitive detection of acetone in exhaled breath through the ambient reaction with water radical cations
Source: Royal Society of Chemistry journal article supplement (doi:10.1039/d1an00402f), 2021-01-01
Supplement: d1an00402f1.pdf [file d1an00402f1.pdf]

## Supporting Information for

# **Rapid and sensitive detection of acetone in exhaled breath through the ambient reaction with water radical cations**

Xiaoping Zhang<sup>a</sup>, Xiang Ren<sup>b</sup>, Yuan Zhong<sup>a</sup>, Konstantin Chingin<sup>a,\*</sup> and Huanwen Chen<sup>a,\*</sup>

<sup>a</sup> Jiangxi Key Laboratory for Mass Spectrometry and Instrumentation, East China University of Technology, Nanchang, P. R. China.

<sup>b</sup> State Key Laboratory of Inorganic Synthesis and Preparative Chemistry, College of Chemistry, Jilin University, Changchun 130012, P. R. China.

\*Corresponding author:

Prof. Huanwen Chen, chw8868@gmail.com;

Prof. Konstantin Chingin, chingin.k@gmail.com

## Contents

**Fig. S1.** The device used to the conversion of liquid phase concentration of acetone solution and gas phase concentration. The temperature of the container was 25 °C, and the pressure inside the flask was  $1.1 \times 10^5$  Pa.

**Fig. S2.** Schematic illustration of acetone vapor analysis by low energy ambient corona discharge ionization mass spectrometry with  $(\text{H}_2\text{O})_2^{++}$  as the extractive ionic reagent.

**Fig. S3.** Dependence of the  $m/z$  76 signal intensity on working conditions in ambient corona discharge ionization MS. (a) Effect of the capillary temperature. (b) Effect of the flow rate of argon gas. (c) Effect of the angle between the tip of the peek tube and the tip of discharge needle. (d) Effect of the distance between the tip of the peek tube and the MS inlet.

**Fig. S4.** The typical total ion chromatogram (TIC) and extracted ion chromatogram (EIC) of water related species when adding  $\text{H}_2\text{O}$  and  $\text{H}_2^{18}\text{O}$  by low energy ambient corona discharge ionization MS. (a) TIC, (b) EIC of  $m/z$  36, (c) EIC of  $m/z$  38, (d) EIC of  $m/z$  40, (e) EIC of  $m/z$  37, (f) EIC of  $m/z$  39, (g) EIC of  $m/z$  41, (h) EIC of  $m/z$  54, (i) EIC of  $m/z$  56, (j) EIC of  $m/z$  58, (k) EIC of  $m/z$  60, (l) EIC of  $m/z$  55, (m) EIC of  $m/z$  57, (n) EIC of  $m/z$  59, (o) EIC of  $m/z$  61.

**Fig. S5.** Mass spectra of reaction between water radical cations and  $\text{NH}_3$ . a) Typical mass spectrum showing  $[\text{NH}_3 + \text{H}_2\text{O}]^{++}$  formation. b) CID of ion of  $m/z$  35  $\rightarrow$  products.

**Fig. S6.** The typical total ion chromatogram (TIC) and extracted ion chromatogram (EIC) of reaction between acetone and water radical cations by low energy ambient corona discharge ionization MS. (a) TIC, (b) EIC of  $m/z$  36, (c) EIC of  $m/z$  59, (d) EIC of  $m/z$  76.

**Fig. S7.** CID-MS spectra of standards interacted with  $(\text{H}_2\text{O})_2^{++}$  by using ambient corona discharge ionization MS. (a) CID-MS spectrum of  $[\text{benzene} + \text{H}_2\text{O}]^{++}$  at  $m/z$  96. (b) CID-MS spectrum of  $[\text{2-pentanone} + \text{H}_2\text{O}]^{++}$  at  $m/z$  104. (c) CID-MS spectrum of  $[\text{propionic acid} + \text{H}_2\text{O}]^{++}$  at  $m/z$  92. (d) CID-MS spectrum of  $[\text{bis(2-hydroxyethyl) disulfide} + \text{H}_2\text{O}]^{++}$  at  $m/z$  172.

**Fig. S8.** CID-MS spectra of breath gas interacted with  $(\text{H}_2\text{O})_2^{++}$  by using ambient corona discharge ionization MS. (a) CID-MS spectrum of  $[\text{trimethylamine} + \text{H}]^+$  at  $m/z$  60. (b) CID-MS spectrum of  $[\text{1-pyrroline} + \text{H}]^+$  at  $m/z$  70. (c) CID-MS spectrum of  $[\text{4-amino-butanal} + \text{H}]^+$  at  $m/z$  882. (d) CID-MS spectrum of  $[\text{benzene} + \text{H}_2\text{O}]^{++}$  at  $m/z$  96.

**Fig. S9. CID-MS spectra of breath gas interacted with  $(\text{H}_2\text{O})_2^{+\bullet}$  by using ambient corona discharge ionization MS.** (a) CID-MS spectrum of [propionic acid +  $\text{H}_2\text{O}$ ] $^{+\bullet}$  at  $m/z$  92. (b) CID-MS spectrum of [2-pentanone +  $\text{H}_2\text{O}$ ] $^{+\bullet}$  at  $m/z$  104. (c) CID-MS spectrum of [butyl acetate +  $\text{H}_2\text{O}$ ] $^{+\bullet}$  at  $m/z$  134. (d) CID-MS spectrum of [2isoxazolidine +  $\text{H}$ ] $^+$ .

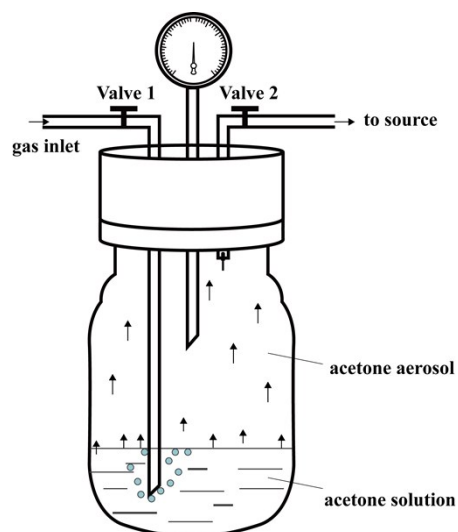

**Fig. S1.** The device used to the conversion of liquid phase concentration of acetone solution and gas phase concentration. The temperature of the container was 25 °C, and the pressure inside the flask was  $1.1 \times 10^5$  Pa.

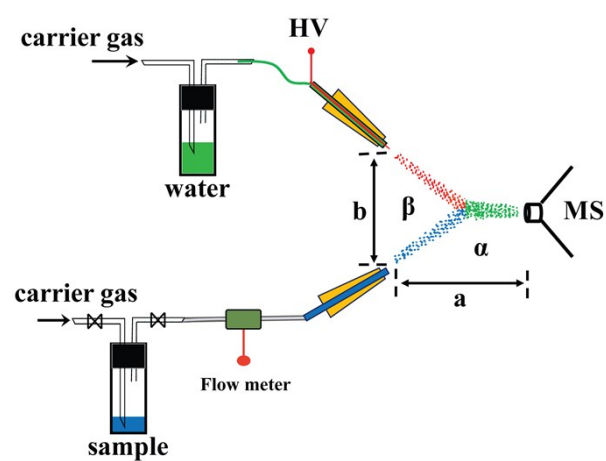

**Fig. S2. Schematic illustration of acetone vapor analysis by low energy ambient corona discharge ionization mass spectrometry with  $(\text{H}_2\text{O})_2^{+*}$  as the extractive ionic reagent.**

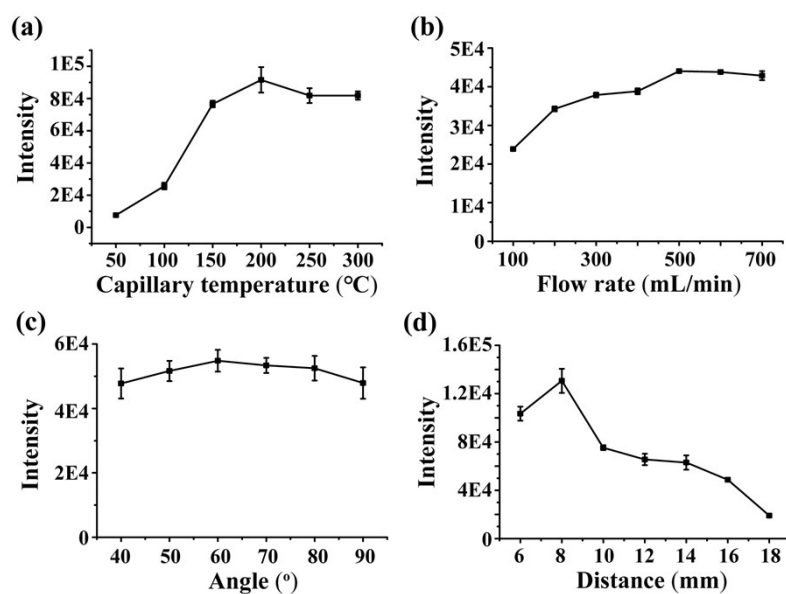

**Fig. S3. Dependence of the  $m/z$  76 signal intensity on working conditions in ambient corona discharge ionization MS.** (a) Effect of the capillary temperature. (b) Effect of the flow rate of argon gas. (c) Effect of the angle between the tip of the peek tube and the tip of discharge needle. (d) Effect of the distance between the tip of the peek tube and the MS inlet.

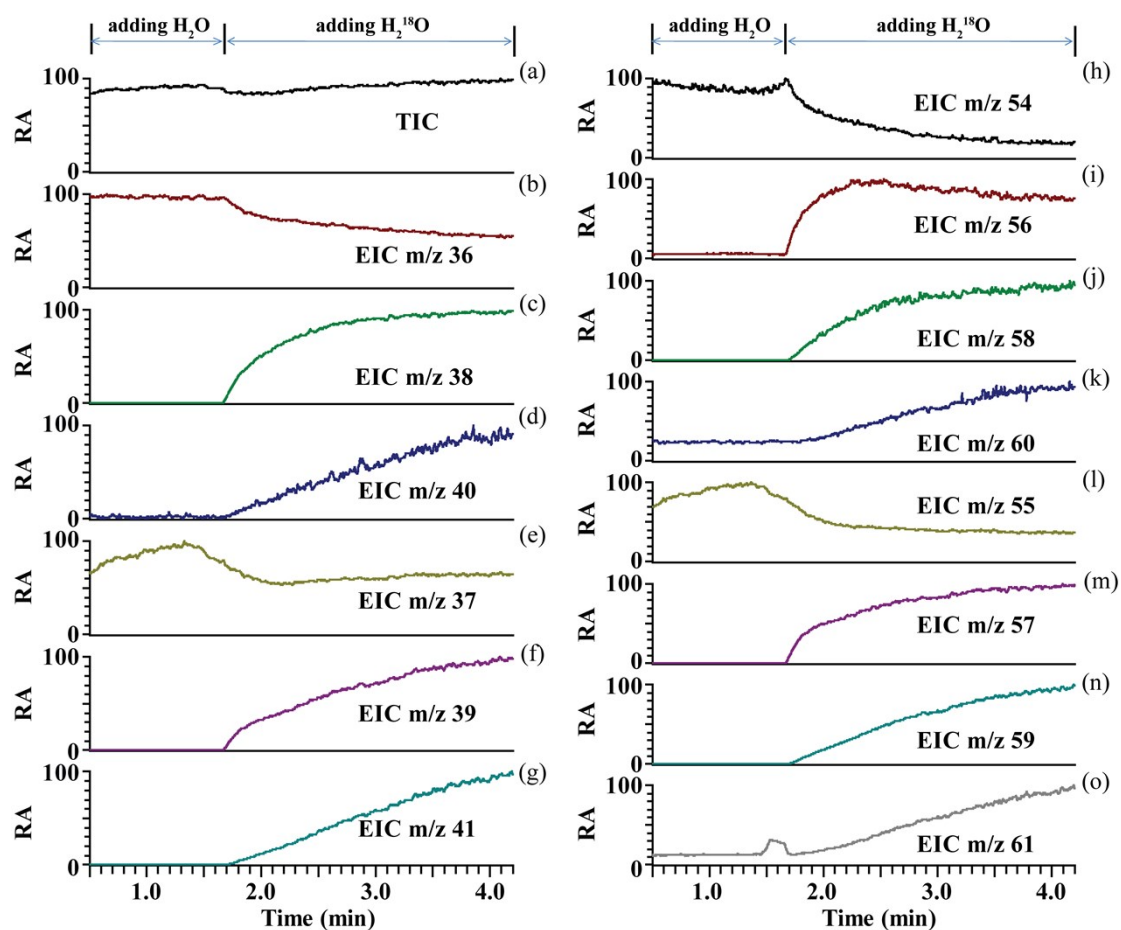

**Fig. S4.** The typical total ion chromatogram (TIC) and extracted ion chromatogram (EIC) of water related species when adding  $\text{H}_2\text{O}$  and  $\text{H}_2^{18}\text{O}$  by low energy ambient corona discharge ionization MS. (a) TIC, (b) EIC of  $m/z$  36, (c) EIC of  $m/z$  38, (d) EIC of  $m/z$  40, (e) EIC of  $m/z$  37, (f) EIC of  $m/z$  39, (g) EIC of  $m/z$  41, (h) EIC of  $m/z$  54, (i) EIC of  $m/z$  56, (j) EIC of  $m/z$  58, (k) EIC of  $m/z$  60, (l) EIC of  $m/z$  55, (m) EIC of  $m/z$  57, (n) EIC of  $m/z$  59, (o) EIC of  $m/z$  61.

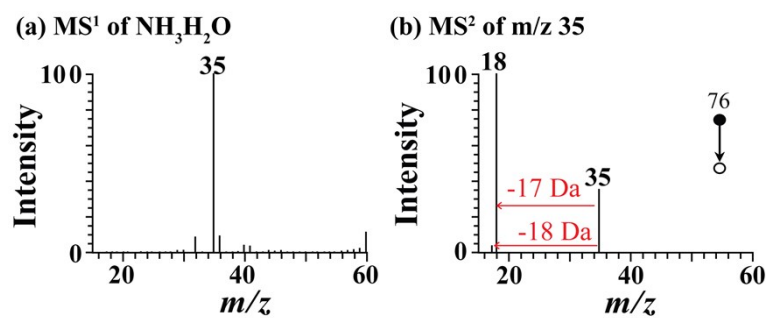

**Fig. S5. Mass spectra of reaction between water radical cations and NH<sub>3</sub>.** a) Typical mass spectrum showing [NH<sub>3</sub> + H<sub>2</sub>O]<sup>++</sup> formation. b) CID of ion of *m/z* 35 → products.



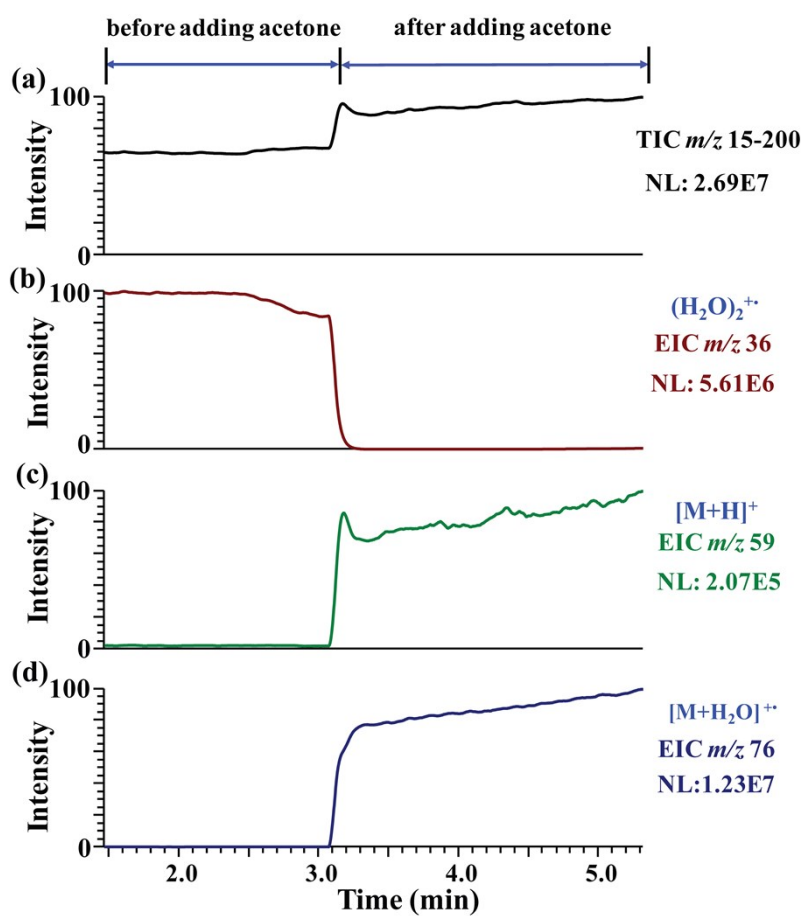

**Fig. S6.** The typical total ion chromatogram (TIC) and extracted ion chromatogram (EIC) of reaction between acetone and water radical cations by low energy ambient corona discharge ionization MS. (a) TIC, (b) EIC of  $m/z$  36, (c) EIC of  $m/z$  59, (d) EIC of  $m/z$  76.

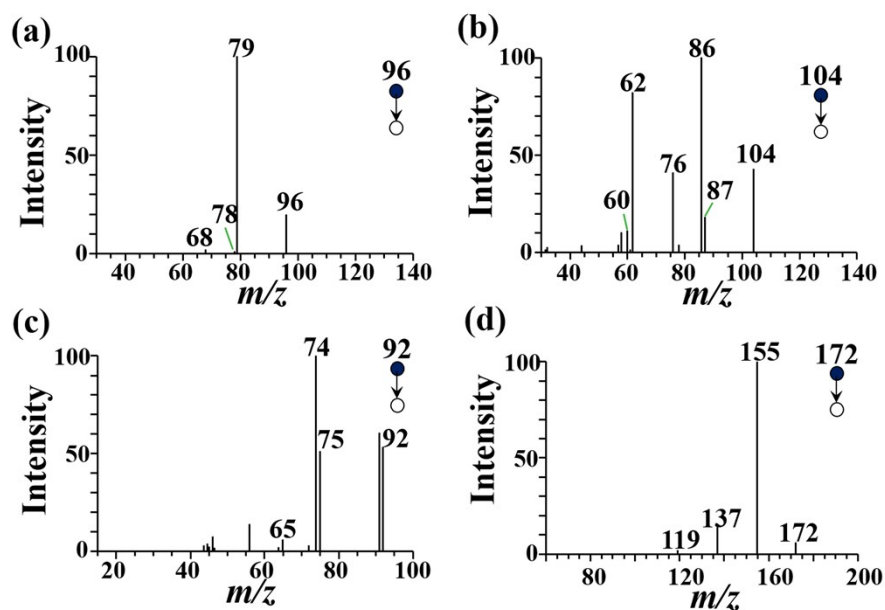

**Fig. S7. CID-MS spectra of standards interacted with  $(\text{H}_2\text{O})_2^{++}$  by using ambient corona discharge ionization MS.** (a) CID-MS spectrum of  $[\text{benzene} + \text{H}_2\text{O}]^{++}$  at  $m/z$  96. (b) CID-MS spectrum of  $[\text{2-pentanone} + \text{H}_2\text{O}]^{++}$  at  $m/z$  104. (c) CID-MS spectrum of  $[\text{propionic acid} + \text{H}_2\text{O}]^{++}$  at  $m/z$  92. (d) CID-MS spectrum of  $[\text{bis(2-hydroxyethyl) disulfide} + \text{H}_2\text{O}]^{++}$  at  $m/z$  172.

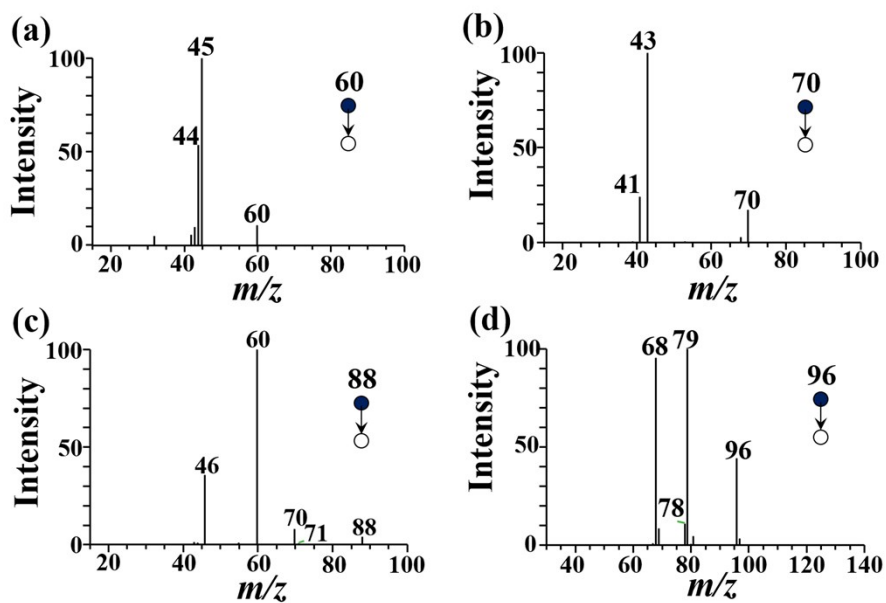

**Fig. S8. CID-MS spectra of breath gas interacted with (H<sub>2</sub>O)<sub>2</sub><sup>++</sup> by using ambient corona discharge ionization MS.** (a) CID-MS spectrum of [trimethylamine + H]<sup>+</sup> at  $m/z$  60. (b) CID-MS spectrum of [1-pyrroline + H]<sup>+</sup> at  $m/z$  70. (c) CID-MS spectrum of [4-amino-butanal + H]<sup>+</sup> at  $m/z$  88. (d) CID-MS spectrum of [benzene + H<sub>2</sub>O]<sup>++</sup> at  $m/z$  96.

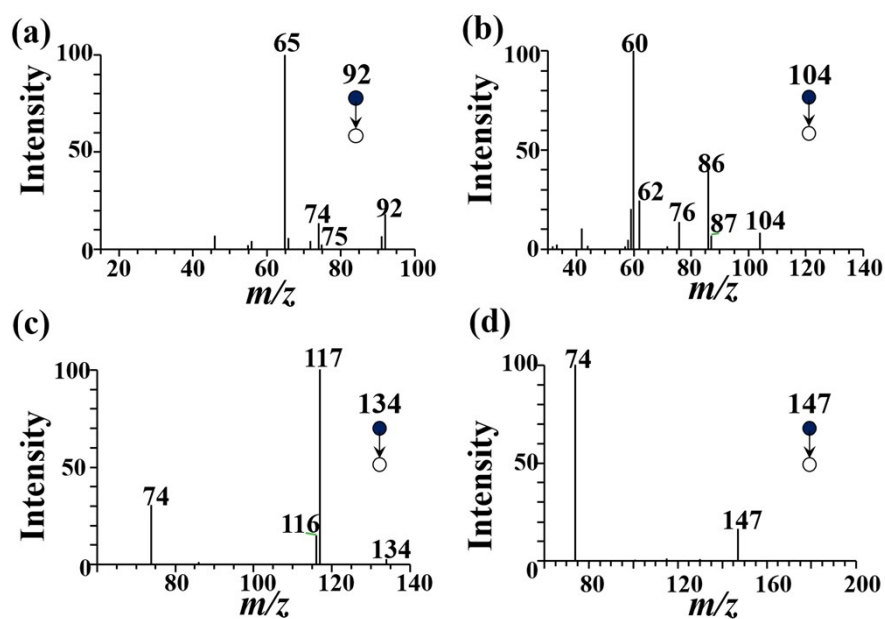

**Fig. S9.** CID-MS spectra of breath gas interacted with  $(\text{H}_2\text{O})_2^{++}$  by using ambient corona discharge ionization MS. (a) CID-MS spectrum of [propionic acid +  $\text{H}_2\text{O}$ ] $^{++}$  at  $m/z$  92. (b) CID-MS spectrum of [2-pentanone +  $\text{H}_2\text{O}$ ] $^{++}$  at  $m/z$  104. (c) CID-MS spectrum of [butyl acetate +  $\text{H}_2\text{O}$ ] $^{++}$  at  $m/z$  134. (d) CID-MS spectrum of [2isoxazolidine +  $\text{H}$ ] $^{+}$ .
